# Supplementary material for: 5azadC treatment upregulates miR-375 level and represses HPV16 E6 expression
Source: PubMed Central journal article supplement (PMC5542257; doi:10.18632/oncotarget.17575), 2017-05-02
Supplement: oncotarget-08-46163-s001.pdf [file oncotarget-08-46163-s001.pdf]

## 5azadC treatment upregulates miR-375 level and represses HPV16 E6 expression

### SUPPLEMENTARY FIGURE

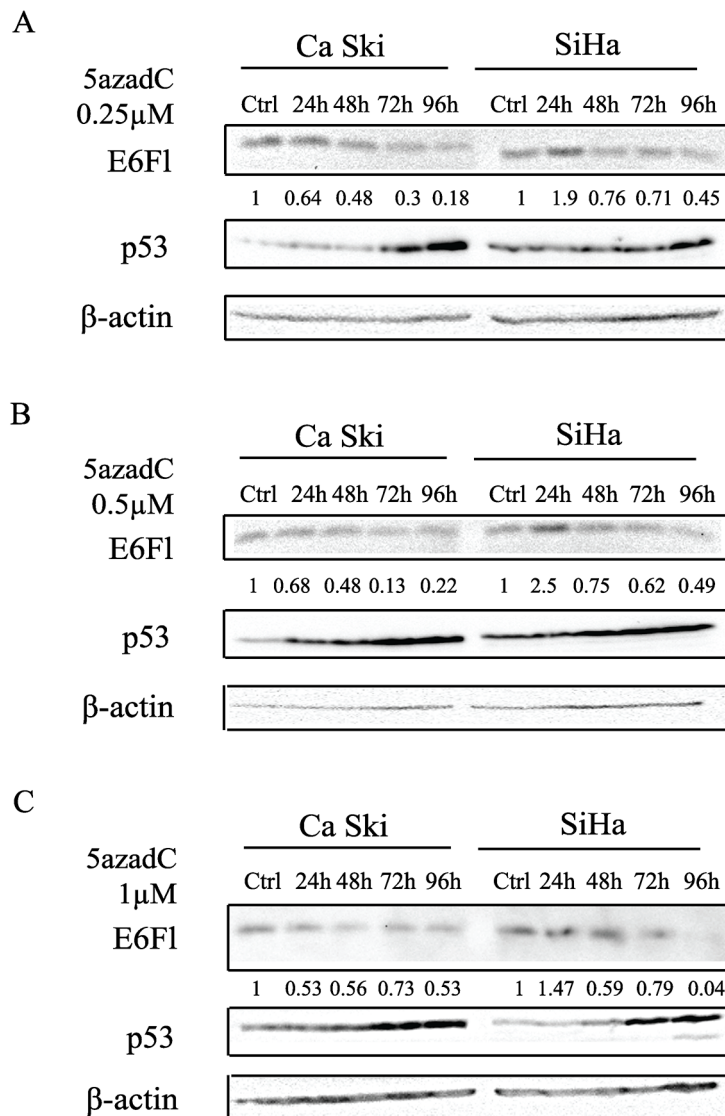

**Supplementary Figure 1:** Ca Ski and SiHa cells were treated with 0.25 µM (A), 0.5 µM (B) and 1 µM (C) of 5azadC for 24 to 96h. Cells were lysed and protein extracts were assayed by Western blotting to assess the levels of E6F1 and p53 proteins. β-actin served as a loading control.
